# Supplementary material for: Fine sand facilitates egg extrusion and improves reproductive output in female mud crab genus Scylla
Source: PeerJ. 2022 Aug 23;10:e13961. doi: 10.7717/peerj.13961 (PMC9415431; doi:10.7717/peerj.13961)
Supplement: Supplemental Information 1 [file peerj-10-13961-s001.xlsx]

## Sheet: Sand particle size
	fine particle size	Coarse
1	46.65	687.42
2	37.25	632.57
3	24.85	589.27
4	47.41	669.21
5	35.27	631.87
6	40.51	666.35
7	55.8	608.6
8	37.79	616.04
9	48.51	655.64
10	32.4	655.09
11	50.69	625.23
12	29.27	610.88
13	34.86	630.37
14	33.41	698.89
15	35.04	644.49
16	46.65	612.21
17	37.25	659.06
18	24.85	625.91
19	47.41	723.97
20	35.27	631.6
21	40.51	651.21
22	55.8	630.59
23	37.79	612.2
24	48.51	620.27
25	32.4	654.26
26	50.69	607.89
27	29.27	730.77
28	34.86	697.02
29	33.41	602.8
30	35.04	722.99
31	46.65	699.72
32	37.25	617.92
33	24.85	685.9
34	47.41	647.59
35	35.27	655.93
36	40.51	604.19
37	55.8	600.17
38	37.79	639.4
39	48.51	629.71
40	32.4	701.12
41	50.69	688.27
42	29.27	681.97
43	34.86	620.79
44	33.41	682.75
45	35.04	701.31
46	46.47	675.67
47	42.71	699.11
48	31.17	635.73
49	35.15	682.54
50	30.55	736.35
51	35.69	737.56
52	54.87	648.85
53	25.25	635.11
54	29.23	660.95
55	33.9	659.73
56	27.26	632.72
57	28.02	731.5
58	26.57	672.98
59	48.08	645.35
60	37.28	668.8
61	42.52	652.78
62	35.1	668.84
63	25.98	691.57
64	39.2	602.72
65	46.47	628.95
66	42.71	720
67	31.17	645.73
68	35.15	611.06
69	30.55	724.48
70	35.69	664.75
71	54.87	577.69
72	25.25	652.64
73	29.23	754.43
74	33.9	631.6
75	27.26	713.5
76	28.02	694.22
77	26.57	682.5
78	48.08	609.39
79	37.28	668.35
80	42.52	681.33
81	35.1	627.13
82	25.98	615.67
83	39.2	679.74
84	46.47	613.24
85	42.71	663.39
86	31.17	652.23
87	35.15	611.57
88	30.55	664.45
89	35.69	621.61
90	54.87	652.76
91	25.25	713.96
92	29.23	689.22
93	33.9	652.33
94	27.26	659.14
95	28.02	637.88
96	26.57	606.92
97	48.08	626.68
98	37.28	628.51
99	42.52	673.26
100	35.1	644.86
101	25.98	630.55
102	39.2	658.01
103	30.65	644.31
104	27.5	708.11
105	42.54	647.52
106	52.08	634.01
107	31.62	639.96
108	46.17	704.4
109	44.76	627.91
110	42.97	689.94
111	37.46	673.14
112	46.65	687.01
113	45.76	685
114	33.49	643.01
115	38.82	670.97
116	43.88	754.75
117	39.02	623.21
118	24.97	669.43
119	32.37	574.79
120	22.61	680.49
121	18.15	635.96
122	31.69	626.1
123	30.29	688.91
124	44.2	636.43
125	37.93	732.9
126	30.65	667.11
127	27.5	705.51
128	42.54	660.11
129	52.08	631.59
130	31.62	627.53
131	46.17	692.36
132	44.76	681.59
133	42.97	627.32
134	37.46	574.4
135	46.65	628.31
136	45.76	634.77
137	33.49	707.76
138	38.82	643.01
139	43.88	620.52
140	39.02	637.7
141	24.97	732.19
142	32.37	683.05
143	22.61	596.87
144	18.15	626.7
145	31.69	626.4
146	30.29	661.57
147	44.2	665.2
148	37.93	628.66
149	30.65	671.68
150	42.54	631.05

## Sheet: Experiment 1
	Scylla olivacea (replicate 1)
	Specimen tag number
Day in sand	1	2	3	4	5	6	7	8	9	10	11	12	13	14	15	16
once	6	6	3	5	6	8	4	2	5	6	6	4	1	4	4	3
two consecutive days	0	0	0	2	0	1	0	1	1	1	0	0	0	0	0	1
three consecutive days	0	0	0	0	0	0	0	1	0	0	0	0	2	0	0	0
four consecutive days	0	0	1	0	0	0	0	0	0	0	0	0	0	0	0	0
five consecutive days	0	0	0	0	0	0	0	0	0	0	0	0	0	1	0	0
at least two days and above	0	0	0	1	0	1	0	1	1	1	0	0	1	1	0	1
success	0	0	1	1	0	0	0	1	0	0	0	0	1	1	0	0		* 0 indicates not successful egg extrusion; 1 indicates successful egg extrusion
	Scylla olivacea (replicate 2)
	Specimen tag number
Day in sand	1	2	3	4	5	6	7	8	9	10	11	12	13	14	15	16
once	5	7	7	6	6	1	1	6	8	5	4	6	7	5	2	4
two consecutive days	0	0	0	0	2	1	0	0	0	0	0	0	0	1	1	2
three consecutive days	1	0	0	0	0	1	0	0	0	0	0	0	0	0	1	0
four consecutive days	0	0	0	0	0	0	1	0	0	1	0	0	0	0	0	0
five consecutive days	0	0	0	0	0	0	0	0	0	0	0	0	0	0	0	0
at least two days and above	1	0	0	0	1	2	1	0	0	1	0	0	0	1	2	2
success	1	0	0	0	1	1	1	0	0	1	0	0	0	0	1	1		* 0 indicates not successful egg extrusion; 1 indicates successful egg extrusion
	Scylla paramamosain (replicate 1)
	Specimen tag number
Day in sand	1	2	3	4	5	6	7	8	9	10	11	12	13	14	15	16
once	3	2	7		9	6	10	4	11	1	8	5	10	11	6	5
two consecutive days	1	2	4	2	2	4	1	4	1	2	2	0	0	0	2	2
three consecutive days	0	2	0	1	0	0	0	1	0	2	0	0	0	0	0	0
four consecutive days	0	0	0	0	0	0	0	0	0	0	0	1	0	0	0	1
five consecutive days	1	0	0	0	0	0	0	0	0	0	0	0	0	0	0	0
at least two days and above	0	0	0	0	0	0	0	0	0	0	0	0	0	0	0	0
success	1	1	0	1	0	1	0	1	0	1	0	1	0	0	0	1		* 0 indicates not successful egg extrusion; 1 indicates successful egg extrusion
	Scylla paramamosain (replicate 2)
	Specimen tag number
Day in sand	1	2	3	4	5	6	7	8	9	10	11	12	13	14	15	16
once	4	11	4	2	4	5	10	8	3	8	1	8	5	6	6	5
two consecutive days	1	1	2	0	5	2	0	1	0	2	1	3	2	1	1	2
three consecutive days	1	0	0	0	0	2	1	0	0	1	1	0	1	1	0	0
four consecutive days	0	0	1	0	0	0	0	0	0	0	1	0	0	0	0	0
five consecutive days	0	0	0	1	0	0	0	0	1	0	0	0	0	0	0	0
at least two days and above	0	0	0	0	0	0	0	0	0	0	0	0	0	0	0	0
success	1	1	1	1	0	0	0	0	1	0	1	0	0	1	0	0		* 0 indicates not successful egg extrusion; 1 indicates successful egg extrusion

## Sheet: Experiment 2
Fine	Spawning success	Clutch size	CW	BW with eggs	BW post extrusion	egg weight	days to extrusion	egg number / 0.01 g (1 replicate)	egg number / 0.01 g (2 replicate)	egg number / 0.01 g (3 replicate)	average egg/0.01 g
1	1	5	98.12	220.5	179.2	41.3	15	402	449	412	421
2	1	6	96.55	225.9	180.6	45.3	21	439	410	448	432.333
3	1	6	97.33	267.8	211.5	56.3	13	399	389	411	399.667
4	1	6	94.36	229.6	182.6	47	18	468	394	453	438.333
5	0		91.33	177.5
6	1	5	97.58	220.9	182.3	38.6	22	416	445	427	429.333
7	0		90.56	181.3
8	1	6	94.44	225.3	188.6	36.7	19	433	402	448	427.667
9	0		92.12	176.4
10	0		92.04	178.9
11	1	6	99.63	251.1	215.8	35.3	10	471	489	452	470.667
12	0		98.37	205.8
Coarse
1	1	3	98.56	221.5	189.9	31.6	24	350	377	382	369.667
2	1	2	93.86	206.7	180.6	26.1	27	349	325	369	347.667
3	0		94.33	179.4
4	0		90.56	214.2
5	0		92.69	205.5
6	0		93.49	182.6
7	0		95.88	194.3
8	1	2	92.47	217.4	189.8	27.6	25	389	347	322	352.667
9	0		91.05	181.3
10	1	4	97.6	231.5	196.9	34.6	21	363	392	329	361.333
11	0		91	176.5
12	0		96.2	188.2
No
1	0		93.65	175.3
2	0		98.22	182.4
3	0		97.31	219.5
4	1	2	98.92	210.4	191.7	18.7	28	347	367	311	341.667
5	0		90.89	192.3
6	0		93.44	178.7
7	0		92.08	184.7
8	0		91.85	182.9
9	0		95.27	190.2
10	0		91.09	178.6
11	0		94.33	179.5
12	0		96.28	196.3
